# Supplementary material for: In vitro reconstitution of dynamically interacting integral membrane subunits of energy-coupling factor transporters
Source: eLife. 2020 Dec 22;9:e64389. doi: 10.7554/eLife.64389 (PMC7755397; doi:10.7554/eLife.64389)
Supplement: Figure 1—source data 1. [file elife-64389-fig1-data1.xlsx]

## Sheet: 20161129 ECF FolT2 ATPase inact
Count	Time	CPMA	SIS		Total counts			WT + MgATP
1	2	5054	11.14		5054			0.16667	1310	1312	1249		1504.02	1506.31	1433.98		0.605401	0.606325	0.577211		0.596312	0.016549
2	2	4955	11		4955			1	3982	3911	3905		4571.76	4490.24	4483.35		1.84023	1.80742	1.80465		1.81744	0.019793
3	2	4897	10.95		4897			4	14077	13240	12784		16161.9	15200.9	14677.4		6.50552	6.11871	5.90798		6.1774	0.303065
4	2	1310	10.9		4968.67			7	19896	20566	16974		22842.7	23611.9	19487.9		9.1947	9.50434	7.84434		8.84779	0.882701
5	2	3982	10.63					10	21838	21647	20853		25072.3	24853	23941.4		10.0922	10.0039	9.63697		9.91102	0.241401
6	2	14077	11.06		2484.33	per 1 pmol		13	23100	22950	22607		26521.2	26349	25955.2		10.6754	10.6061	10.4476		10.5763	0.116791
7	2	19896	11					16	22447	23226	23248		25771.5	26665.9	26691.2		10.3736	10.7336	10.7438		10.617	0.210846
8	2	21838	10.97
9	2	23100	11.03		WT+MgATP	0.871		WT + MgADP
10	2	22447	11.13		WT+MgADP	0.886		0.16667	260	246	225		293.454	277.652	253.95		0.118122	0.111761	0.102221		0.110701	0.00800333
11	2	1312	10.88					1	245	286	264		276.524	322.799	297.968		0.111307	0.129934	0.119939		0.120393	0.00932175
12	2	3911	11.09					4	292	315	280		329.571	355.53	316.027		0.13266	0.143109	0.127208		0.134326	0.00808033
13	2	13240	11.13					7	372	290	279		419.865	327.314	314.898		0.169005	0.131751	0.126754		0.142503	0.0230867
14	2	20566	11.11					10	365	306	330		411.964	345.372	372.46		0.165825	0.13902	0.149924		0.15159	0.0134797
15	2	21647	11.07					13	343	279	299		387.133	314.898	337.472		0.15583	0.126754	0.13584		0.139474	0.0148749
16	2	22950	11.11					16	351	277	317		396.163	312.641	357.788		0.159464	0.125845	0.144018		0.143109	0.016828
17	2	23226	10.99
18	2	1249	11.02
19	2	3905	11.12
20	2	12784	11.08
21	2	16974	10.96
22	2	20853	10.96
23	2	22607	10.99
24	2	23248	11
25	2	260	11.44
26	2	245	10.83
27	2	292	11.68
28	2	372	11.29
29	2	365	11.85
30	2	343	11.04
31	2	351	11.6
32	2	246	11.52
33	2	286	11.1
34	2	315	11.81
35	2	290	11.42
36	2	306	11.71
37	2	279	11.77
38	2	277	11.21
39	2	225	11.21
40	2	264	11.73
41	2	280	11.16
42	2	279	11.44
43	2	330	10.95
44	2	299	11.31
45	2	317	10.86
46	2	1157	10.74
47	2	1092	11.01
48	2	1334	10.65
49	2	1689	11.03
50	2	2039	11.01
51	2	2278	11.06
52	2	2596	10.75
53	2	1056	11.54
54	2	1113	11.26
55	2	1445	11.48
56	2	1796	11.19
57	2	2134	11.08
58	2	2418	11.15
59	2	2937	11.22
60	2	1134	11.17
61	2	1132	11.12
62	2	1365	10.99
63	2	1756	11.06
64	2	2027	10.93
65	2	2413	11.37
66	2	2762	11.11
67	2	1906	10.9
68	2	2078	11.26
69	2	2307	11.14
70	2	2799	11.12
71	2	2471	11.23
72	2	3429	11.12
73	2	4859	11.14
74	2	1968	11.22
75	2	1897	11.16
76	2	2341	11.38
77	2	2694	11.1
78	2	3184	11.21
79	2	3576	11.25
80	2	4135	11.31
81	2	2227	11.55
82	2	1882	11.21
83	2	2353	11.2
84	2	2717	11.39
85	2	3119	11.22
86	2	3622	11.14
87	2	3901	11.31
88	2	767	11.69
89	2	1691	11.33
90	2	4786	11.21
91	2	7379	11.38
92	2	8095	11.32
93	2	10504	11.21
94	2	12922	11.33
95	2	851	11.48
96	2	1597	11.41
97	2	4727	11.34
98	2	7384	11.39
99	2	9397	11.34
100	2	11891	11.36
101	2	12824	11.11
102	2	744	11.33
103	2	1619	11.28
104	2	4427	11.09
105	2	13847	11.2
106	2	57	14.09
107	2	11225	11.19
108	2	12330	11.29
109	2	698	10.91
110	2	2200	10.76
111	2	5518	10.95
112	2	8902	11.01
113	2	11290	10.95
114	2	13870	10.87
115	2	15210	10.88
116	2	43	13.28
117	2	51	15.03
118	2	5701	10.96
119	2	8869	10.98
120	2	11203	11.1
121	2	13298	10.89
122	2	15381	10.92
123	2	378	11.51
124	2	499	11.19
125	2	736	11.28
126	2	993	11.15
127	2	1226	10.92
128	2	1488	11.02
129	2	1597	11.06
130	2	540	10.98
131	2	436	10.65
132	2	634	11.05
133	2	963	10.94
134	2	1056	10.69
135	2	1293	10.67
136	2	1560	10.73
137	2	719	11.35
138	2	508	11.08
139	2	718	11.08
140	2	640	11.1
141	2	3009	11.09
142	2	3208	10.86
143	2	5258	10.88
144	2	6858	10.97
145	2	8157	10.8
146	2	10224	11.05
147	2	968	10.85
148	2	3584	11.05
149	2	9237	11.13
150	2	5026	10.98
151	2	6218	10.86
152	2	8683	11.07
153	2	7108	11.01
