# Supplementary material for: In vitro reconstitution of dynamically interacting integral membrane subunits of energy-coupling factor transporters
Source: eLife. 2020 Dec 22;9:e64389. doi: 10.7554/eLife.64389 (PMC7755397; doi:10.7554/eLife.64389)
Supplement: Figure 1—source data 3. [file elife-64389-fig1-data3.xlsx]

## Sheet: Guus
S#	Count Time	CPMA	SIS	MESSAGES
1	2	247	10.31
2	2	251	10.23
3	2	492	10.77
4	2	319	10.52
5	2	331	10.04
6	2	259	10.19
7	2	328	10.93
8	2	527	10.58
9	2	409	10.24
10	2	386	10.78
Missing vial 11.
12	2	409	10.47
13	2	355	10.23
14	2	477	10.42
15	2	419	10.01
16	2	366	10.25
17	2	285	10.57
18	2	442	10.28
19	2	411	10.1
20	2	467	9.95
21	2	320	10.59
Missing vial 22.
23	2	237	10.85
24	2	540	9.86
25	2	353	9.98
26	2	303	10.58
27	2	295	10.36
28	2	312	10.65
29	2	402	10.18
30	2	279	10.55
31	2	433	10.66
32	2	1400	9.84
Missing vial 33.
34	2	583	9.7
35	2	293	10.62
36	2	359	11.01
37	2	322	9.56
38	2	362	10.51
39	2	406	10.27
40	2	418	10.34
41	2	326	10.61
42	2	337	10.81
43	2	428	10.59
Missing vial 44.
45	2	386	10.04
46	2	1309	10.18
47	2	962	10.22
48	2	1335	10.12
49	2	1483	9.64
50	2	454	10.3
51	2	937	9.96
52	2	900	10.01
53	2	1046	9.99
54	2	1616	9.78
Missing vial 55.
56	2	374	10.54
57	2	400	10.45
58	2	550	10.38
59	2	514	10.21
60	2	628	9.98
61	2	340	10.17
62	2	368	10.53
63	2	464	10.06
64	2	517	10.11
65	2	610	10.72
Missing vial 66.
67	2	447	10.14
68	2	397	10.46
69	2	856	10.05
70	2	447	10.19
71	2	1053	9.99
72	2	338	10.54
73	2	767	10.14
74	2	495	10.42
75	2	489	10.45
76	2	688	9.66
Missing vial 77.
78	2	682	11.02
79	2	1685	10.18
80	2	1821	10.09
81	2	2903	10
82	2	5028	9.65
83	2	70	13.17		CPMA	ECF FolT2 WT
84	2	908	9.98			pantothenate	pantothenate 2
85	2	1399	9.94		0.17	458	351
86	2	1821	9.9		1	617	588
87	2	3374	9.68		3	578	437
Missing vial 88.					6	376	929
89	2	458	10.76		15	697	444
90	2	617	10.98		CPPM
91	2	578	11.23		0.17	0.0783821	0.0600701
92	2	376	11.13		1	0.105593	0.10063
93	2	697	11.04		3	0.0989189	0.0747882
94	2	351	11.41		6	0.0643486	0.158989
95	2	588	10.79		15	0.119285	0.0759862
96	2	437	11.36		AVERAGE CPPM	average CPPMpmol/ug
97	2	929	10.81		0.17	0.0692261	0.314664
98	2	444	11.33		1	0.103112	0.46869
Missing vial 99.					3	0.0868535	0.394789
100	2	6504	10.09		6	0.111669	0.507586
101	2	6457	10.07		15	0.0976354	0.443797
102	2	11782	9.98
103	2	6818	10.04
104	2	6425	9.87		TC [1/10]
105	2	6547	9.86		folate	folate 1/2	pantothenate
106	2	6216	9.87		6377.5	2340.5	11686.3
107	2	6230	9.76
108	2	6029	10.13		3188.75	2925.62	5843.17
Missing vial 109.
110	2	2266	9.94
111	2	2415	9.74
Missing vial 112.
113	2	11915	10.93
114	2	11187	10.74
115	2	11957	10.92
