# Supplementary material for: In vitro reconstitution of dynamically interacting integral membrane subunits of energy-coupling factor transporters
Source: eLife. 2020 Dec 22;9:e64389. doi: 10.7554/eLife.64389 (PMC7755397; doi:10.7554/eLife.64389)
Supplement: Figure 2—source data 1. [file elife-64389-fig2-data1.xlsx]

## Sheet: Guus
S#	Count Time	CPMA	SIS	MESSAGES			CPMA																																			S#	Count Time	CPMA	SIS	MESSAGES			Km for ATP
1	2	1371	12.4			Time	5 nM			20 nM			50 nM			100 nM			300 nM			400 nM			500 nM																	1	2	1011	12.41				CPMA
2	2	2444	12.32			0.17	1371	1541		1274	1435		1096	1323		785	834		1125	1305		1734	1549		2791	2105							TC									2	2	5730	12.38			10 mM
3	2	7772	12.31			0.5	2444	2269	2456	2079	1983	2022	1677	1717	1391	1200	1240	1148	1677	1303	1677	2778	2396	3016	3120	3236	3038						0.5 uM hot	1.5 uM hot	3 uM hot	4 uM hot						3	2	10562	12.4		0.17	1011	914
4	2	13985	12.21			2	7772	7207	7006	6470	6483	6104	4787	4505	4340	3680	3540	3172	4625	4431	4235	5340	5656	5659	6487	6263	8417						3286	6404	17019	23169						4	2	14613	12.24		2	5730	6024
5	2	19200	12.31			4	13985	12779	12966	11044	10967	11084	9137	8098	7407	6443	6540	5915	7333	7615	7615	9791	9923	10436	11331	10887	12421						3498	7816	17998	18462						5	2	17534	12.33		4	10562	10715
6	2	22830	12.31			6	19200	17886	18336	16425	15941	15837	12547	11563	10490	8903	8991	8271	10171	10039	9992	13787	13373	13470	14634	14918	14686						3298	9254	9240	24463						6	2	914	12.13		6	14613	15319
7	2	1274	12.34			8	22830	22243	21827	20402	19534	18489	15693	14722	12661	10499	11088	10412	12345	13078	12138	17064	16498	16714	18141	18809	17212						2556									7	2	6024	12.35		8	17534	19326
8	2	2079	12.5																														3456									8	2	10715	12.25
9	2	6470	12.26																														3516									9	2	15319	12.3
10	2	11044	12.32				CPMA																										3006									10	2	19326	12.24				pmol/ug
11	2	16425	12.27			Time	5 nM			20 nM			50 nM			100 nM			300 nM			400 nM			500 nM								3670									11	2	870	12.26			10 mM
12	2	20402	12.19			0.17	0.0869284	0.0977073		0.323112	0.363945		0.69492	0.83885		0.99546	1.0576		1.64763	1.91125		1.65063	1.47452		2.44146	1.84137							Average:									12	2	6417	12.36		0.17	1.42144	1.28506
13	2	1096	12.26			0.5	0.154962	0.143866	0.155723	0.527277	0.502929	0.512821	1.0633	1.08867	0.881965	1.52172	1.57245	1.45578	2.45606	1.90832	2.45606	2.64443	2.2808	2.87099	2.72926	2.83073	2.65753						3285.75	8535	17508.5	23816						13	2	11189	12.18		2	8.05624	8.4696
14	2	1677	12.29			2	0.492784	0.456961	0.444216	1.64092	1.64422	1.5481	3.0352	2.8564	2.75178	4.66662	4.48908	4.02242	6.77358	6.48946	6.2024	5.08325	5.38405	5.38691	5.67458	5.47863	7.36287						1 pmol = x counts:									14	2	15918	12.36		4	14.8499	15.065
15	2	4787	12.18			4	0.88672	0.810254	0.822111	2.80098	2.78146	2.81113	5.79332	5.13455	4.69642	8.17038	8.29339	7.50082	10.7396	11.1526	11.1526	9.32023	9.44589	9.93422	9.91193	9.52353	10.8654						5 nM	20 nM	50 nM	100 nM	300 nM	400 nM	500 nM			15	2	19614	12.29		6	20.5455	21.5381
16	2	9137	12.26			6	1.21738	1.13406	1.1626	4.16572	4.04296	4.01659	7.95544	7.33153	6.6512	11.2899	11.4015	10.4885	14.896	14.7027	14.6339	13.1241	12.73	12.8223	12.8013	13.0497	12.8468						65715	16428.8	6571.5	3285.75	2845	4377.12	4763.2			16	2	867	12.25		8	24.6524	27.1719
17	2	12547	12.18			8	1.44754	1.41032	1.38394	5.17436	4.95422	4.68919	9.95016	9.3345	8.02772	13.3138	14.0607	13.2035	18.08	19.1535	17.7768	16.2435	15.7048	15.9104	15.8691	16.4534	15.0564															17	2	5578	12.26
18	2	15693	12.22																																							18	2	10288	12.12
19	2	785	12.51																																							19	2	14127	12.29
20	2	1200	12.19																																							20	2	17530	12.36
21	2	3680	12.35				Average									Std dev																										21	2	858	12.47				AVERAGE
22	2	6443	12.11			Time	5 nM	20 nM	50 nM	100 nM	300 nM	400 nM	500 nM	ADP	Time	5 nM	20 nM	50 nM	100 nM	300 nM	400 nM	500 nM																				22	2	5481	12.26			10 mM	8 mM
23	2	8903	12.21			0.17	0.0923178	0.343529	0.766885	1.02653	1.77944	1.56257	2.14142	0.190675	0.17	0.00762181	0.0288732	0.101774	0.0439375	0.186408	0.124525	0.424325	0.0294417																			23	2	9667	12.23		0.17	1.3099	1.20398
24	2	10499	12.22			0.5	0.151517	0.514342	1.01131	1.51665	2.27348	2.59874	2.73917		0.5	0.00663677	0.0122449	0.112733	0.0584979	0.31624	0.297736	0.087026																				24	2	13425	12.31		2	8.51599	7.73568
25	2	1125	12.34			2	0.464654	1.61108	2.88113	4.39271	6.48848	5.28473	6.17203	0.207219	2	0.0251815	0.0545693	0.143319	0.332736	0.28559	0.174501	1.03594	0.0122836																			25	2	16905	12.19		4	15.2155	14.0307
26	2	1677	12.44			4	0.839695	2.79786	5.2081	7.9882	11.0149	9.56678	10.1003	0.278499	4	0.0411545	0.0150821	0.552141	0.426536	0.238449	0.324356	0.690489	0.0101389																			26	2	844	12.7		6	21.488	19.4953
27	2	4625	12.16			6	1.17135	4.07509	7.31272	11.06	14.7442	12.8922	12.8992	0.366184	6	0.0423408	0.0795856	0.652325	0.498061	0.135915	0.206113	0.132271	0.102949																			27	2	5447	12.29		8	26.467	24.3604
28	2	7333	12.01			8	1.41393	4.93926	9.10413	13.526	18.3368	15.9529		0.33861	8	0.0319513	0.242934	0.981708	0.466352	0.723373	0.271898	0.7016	0.027297																			28	2	9983	12.36
29	2	10171	12.24																																							29	2	14046	12.28
30	2	12345	12.15																																							30	2	17544	12.31
31	2	1734	12.29																																							31	2	792	12.11
32	2	2778	12.37																																							32	2	3586	12.32
33	2	5340	11.85																																							33	2	6659	12.35
34	2	9791	12.27																																							34	2	9269	12.24
35	2	13787	12.35																																							35	2	11671	12.26
36	2	17064	12.16																																							36	2	832	11.92
37	2	2791	12.17																																							37	2	3757	12.32
38	2	3120	12.26																																							38	2	6385	12.28
39	2	6487	12.31																																							39	2	9132	12.25
40	2	11331	12.13																																							40	2	11415	12.36
41	2	14634	12.18																																							41	2	741	11.99
42	2	18141	12.27																																							42	2	3388	12.35
43	2	1541	12.33																																							43	2	6106	12.38
44	2	2269	12.06																																							44	2	8459	11.99
45	2	7207	12.21																																							45	2	10668	12.39
46	2	12779	12.32																																							46	2	591	12.53
47	2	17886	12.13																																							47	2	2523	12.31
48	2	22243	12.28																																							48	2	4370	12.18
49	2	1435	12.47																																							49	2	6098	12.3
50	2	1983	12.37																																							50	2	7483	12.38
51	2	6483	12.39																																							51	2	624	12.16
52	2	10967	12.29																																							52	2	2594	12.13
53	2	15941	12.26														Initial velocity																									53	2	4573	12.44
54	2	19534	12.31													Pantothenate conc.	1st	1st optimized	2nd	2nd optimized	3rd	3rd optimized	Average	Average optimized	From average		Error															54	2	6130	12.27
55	2	1323	12.27													ADP							0.0232	0.0232	0.0232	0																55	2	7457	12.11
56	2	1717	12.26													5 nM	0.1782	0.1959	0.1705		0.1693	0.1841	0.172667	0.1776	0.1728	5	0.00482942															56	2	660	12.24
57	2	4505	12.15													20 nM	0.6274		0.599		0.5755	0.6335	0.600633	0.619967	0.6011	20	0.0259885															57	2	2558	12.38
58	2	8098	12.23													50 nM	1.2038		1.1008		0.9643	1.0355	1.08963	1.11337	1.088	50	0.12014															58	2	4362	12.45
59	2	11563	12.3													100 nM	1.6209	1.7858	1.6955		1.5802	1.644	1.6322	1.65347	1.6329	100	0.0584747															59	2	6065	12.34
60	2	14722	12.25													300 nM	2.1185	2.2697	2.2364		2.0806		2.14517	2.14517	2.1481	300	0.0812511															60	2	7501	12.25
61	2	834	12.14													400 nM	1.7578		1.8336		1.6902	1.8159	1.76053	1.80243	1.844	400	0.0717391															61	2	808	12.56
62	2	1240	12.38													500 nM	1.878		1.8604		1.8275	1.9346	1.8553	1.891	1.8858	500	0.0256334															62	2	1214	12.15
63	2	3540	12.41																																							63	2	1773	12.38
64	2	6540	12.28																																							64	2	2298	12.29
65	2	8991	12.29																																							65	2	2724	12.39
66	2	11088	12.2																																							66	2	581	12.3
67	2	1305	12.19																																							67	2	1198	12.23
68	2	1303	12.22																																							68	2	1733	12.34
69	2	4431	12.3																																							69	2	2315	12.3
70	2	7615	12.24																																							70	2	2648	12.5
71	2	10039	12.29																																							71	2	504	12.66
72	2	13078	12.19																																							72	2	1141	11.96
73	2	1549	12.22																																							73	2	1659	12.49
74	2	2396	12.27																																							74	2	2206	12.35
75	2	5656	12.12																																							75	2	2616	12.08
76	2	9923	12.23																																							76	2	740	12.37
77	2	13373	12.18																																							77	2	702	12.03
78	2	16498	12.18																																							78	2	792	12.3
79	2	2105	12.31																																							79	2	885	12.29
80	2	3236	12.35																																							80	2	1036	12.17
81	2	6263	12.24																																							81	2	489	12.93
82	2	10887	12.15																																							82	2	622	12.4
83	2	14918	12.26																																							83	2	817	12.51
84	2	18809	12.22																																							84	2	969	12.26
85	2	2456	12.2																																							85	2	1016	12.44
86	2	7006	12.05																																							86	2	510	12.56
87	2	12966	12.29																																							87	2	635	12.33
88	2	18336	12.27																																							88	2	780	12.42
89	2	21827	12.32																																							89	2	955	12.43
90	2	2022	12.1																																							90	2	1002	12.44
91	2	6104	12.25																																							91	2	576	12.43
92	2	11084	12.19																																							92	2	718	12.4
93	2	15837	12.22																																							93	2	684	12.23
94	2	18489	12.3																																							94	2	824	12.26
95	2	1391	12.59																																							95	2	797	12.62
96	2	4340	12.29																																							96	2	491	12.15
97	2	7407	12.27																																							97	2	653	12.33
98	2	10490	12.15																																							98	2	701	12.9
99	2	12661	12.2																																							99	2	732	12.29
100	2	1148	12.5																																							100	2	752	12.29
101	2	3172	12.36																																							101	2	586	12.41
102	2	5915	12.11																																							102	2	605	11.92			Ki for ADP
103	2	8271	12.26																																							103	2	723	12.24
104	2	10412	12.26																																							104	2	696	12.29			CPMA
105	2	1677	12.21																																							105	2	819	12.34		Time	ATP
106	2	4235	12.35																																							106	2	387	12.55		0.17	783	844
107	2	7615	12.33																																							107	2	511	12.47		2	3529	3564
108	2	9992	12.28																																							108	2	634	12.27		4	6334	6316
109	2	12138	12.2																																							109	2	616	12.6		6	9118	8887
110	2	3016	12.25																																							110	2	593	12.68		8	11380	11215
111	2	5659	12.4																																							111	2	445	12.03
112	2	10436	12.36																																							112	2	509	12.36
113	2	13470	12.23																																							113	2	579	12.19			pmol/ug ECF PanT
114	2	16714	12.1																																							114	2	627	12.89		Time	ATP
115	2	3038	12.16																																							115	2	767	12.23		0.17	1.10088	1.18664
116	2	8417	12.22																																							116	2	394	11.97		2	4.96169	5.0109
117	2	12421	12.29																																							117	2	500	12.24		4	8.90545	8.88014
118	2	14686	12.37																																							118	2	549	12.26		6	12.8197	12.4949
119	2	17212	12.26																																							119	2	563	12.33		8	16	15.768
120	2	3286	12.23																																							120	2	658	12.31
121	2	3498	12.37																																							Missing vial 121.						Average
122	2	3298	12.31																																							122	2	748	12.5		Time	ATP	0.25
123	2	2556	12.32																																							123	2	3593	12.28		0.17	1.09947	1.09807
124	2	6404	12.18																																							124	2	5756	12.23		2	4.9092	5.00762
125	2	17019	12.35																																							125	2	8739	12.25		4	8.73907	8.52115
126	2	23169	12.27																																							126	2	10760	12.34		6	12.3154	12.2385
127	2	3456	12.38																																							127	2	844	12.4		8	15.4142	13.8695
128	2	3516	12.29																																							128	2	3452	12.11
129	2	3006	12.4																																							129	2	6176	12.21
130	2	3670	12.37																																							130	2	9114	12.2
131	2	7816	12.24																																							131	2	8387	12.26
132	2	17998	12.31																																							132	2	751	12.08
133	2	18462	12.34																																							133	2	3640	12.15
134	2	1888	12.41																																							134	2	6250	12.19
135	2	57	13.29																																							135	2	8261	12.1
136	2	46	15.7																																							136	2	10447	12.21
137	2	48	13.91																																							137	2	739	11.94
138	2	9254	12.08																																							138	2	2077	12.01
139	2	9240	12.25																																							139	2	3554	12.34
140	2	24463	12.39																																							140	2	4731	12.13
																																										141	2	6251	12.3
																																										142	2	574	12.05
																																										143	2	2050	12.41
																																										144	2	3251	12.23
																																										145	2	4723	12.1
																																										146	2	5850	12.18
																																										147	2	579	12.23
																																										148	2	1434	12.17
																																										149	2	2170	12.33
																																										150	2	3113	12.33
																																										151	2	3949	12.16
																																										152	2	689	12.42
																																										153	2	2846	12.25
																																										154	2	5072	12.19
																																										155	2	7176	12.27
																																										156	2	8701	12.3
																																										157	2	831	12.29
																																										158	2	3073	12.14
																																										159	2	5272	12.36
																																										160	2	7310	12.24
																																										161	2	9243	12.21
																																										162	2	774	12.34
																																										163	2	2873	12.15
																																										164	2	5026	12.38
																																										165	2	7138	12.18
																																										166	2	8647	12.15
																																										167	2	894	12.23
																																										168	2	3934	12.33
																																										169	2	6903	12.28
																																										170	2	9768	12.12
																																										171	2	12328	12.2
																																										172	2	839	12.69
																																										173	2	3831	12.35
																																										174	2	6990	12.25
																																										175	2	9738	12.24
																																										176	2	12241	12.24
																																										177	2	885	12.33
																																										178	2	3853	12.25
																																										179	2	6922	12.31
																																										180	2	9444	12.3
																																										181	2	11463	12.3
																																										182	2	703	12.83
																																										183	2	2938	12.35
																																										184	2	5036	12.51
																																										185	2	7011	12.27
																																										186	2	8594	12.09
																																										187	2	532	12.36
																																										188	2	2918	12.23
																																										189	2	5155	12.37
																																										190	2	7029	12.28
																																										191	2	8715	12.21
																																										192	2	765	12.23
																																										193	2	2844	12.21
																																										194	2	4890	12.47
																																										195	2	6986	12.45
																																										196	2	8121	11.99
																																										197	2	879	12.27
																																										198	2	2310	12.06
																																										199	2	3866	12.34
																																										200	2	5234	12.06
																																										201	2	6504	12.23
																																										202	2	849	12.45
																																										203	2	2452	12.33
																																										204	2	3967	12.1
																																										205	2	5187	12.28
																																										206	2	6384	11.89
																																										207	2	920	12.35
																																										208	2	2351	12.51
																																										209	2	3817	12.25
																																										210	2	5223	12.26
																																										211	2	6390	12.33
																																										212	2	510	12.37
																																										213	2	642	12.21
																																										214	2	868	12.07
																																										215	2	1059	11.93
																																										216	2	1053	12.35
																																										217	2	504	12.54
																																										218	2	592	12.9
																																										219	2	688	12.19
																																										220	2	798	12.46
																																										221	2	899	12.31
																																										222	2	498	12.74
																																										223	2	652	12.48
																																										224	2	681	12.11
																																										225	2	957	12.49
																																										226	2	804	12.41
																																										227	2	3451	12.25
																																										228	2	5898	12.31
																																										229	2	3808	12.29
																																										230	2	4768	12.29
																																										231	2	12021	12.23
																																										232	2	9681	12.29
																																										233	2	5876	12.35
																																										234	2	5023	12.41
																																										235	2	6560	12.36
																																										236	2	6262	12.31
																																										237	2	5613	12.29
																																										238	2	5695	12.43
																																										239	2	5913	12.25
																																										240	2	6068	12.39
																																										241	2	6085	12.22
																																										242	2	5312	12.37
																																										243	2	5657	12.29
																																										244	2	56	14.16
																																										245	2	5703	12.12
																																										246	2	11641	12.3
[truncated: 27 more columns]
