# Supplementary material for: In vitro reconstitution of dynamically interacting integral membrane subunits of energy-coupling factor transporters
Source: eLife. 2020 Dec 22;9:e64389. doi: 10.7554/eLife.64389 (PMC7755397; doi:10.7554/eLife.64389)
Supplement: Figure 3—source data 1. [file elife-64389-fig3-data1.xlsx]

## Sheet: 21.04.2016
S#	Count Time	CPMA	SIS	MESSAGES				Folate transport
1	2	6446	10.55		TC [1/10}		CPMA																			CPMA	Folate uptake					CPMA	Pantothenate uptake
2	2	725	10.73		11018		Time	ECF PanT		ECF PanT + FolT2 wt		ECF PanT + FolT2 cysless														Time	[3H]folte		TC [1/10]	TC [3H]folate		Time	PanT		ECF FolT2/PanT		TC [1/10]	TC [3H]pantothenate
3	2	581	10.58		11445		0.17	757	681	6446	7634	2643	2982													0.17	574	717		15737		0.17	261	283	236	624		10434
4	2	761	10.83		11010		3	725	510	26262	25779	26050	24843													3	1761	1186		12214		3	462	616	1098	642		11084
5	2	675	10.82		12442		6	581	535	43031	42880	44459	42308													6	2427	1908		11457		8	477	486	1983	1452		13219
6	2	757	10.7		10902		9	761	883	51139	52744	52082	52212													9	4797	2610				16	458	572	3111	1683		5825
7	2	26262	10.54		11322		15	675	892	57832	58446	51983	55795													15	4238	3668	Average	13136		25	592	507	3927	2177	Average	11579
8	2	43031	10.63		Average:
9	2	51139	10.46		11356.5		pmol/ug																			pmol/ug	Folate uptake		1 pmol	6568		pmol/ug	Pantothenate uptake				1 pmol	5789.5
10	2	57832	10.79		1 pmol:		Time	ECF PanT		ECF PanT + FolT2 wt		ECF PanT + FolT2 cysless														Time	[3H]folte					Time	PanT		ECF FolT2/PanT
11	2	2643	10.55		5678.25		0.17	0.765657	0.688788	5.92702	7.01937	2.43021	2.74191													0.17	0.349574	0.436663				0.17	0.180326	0.195526	0.163054	0.856996		2912.5
12	2	26050	10.57				3	0.733291	0.515832	24.1476	23.7035	23.9526	22.8428													3	1.07247	0.72229				3	0.319199	0.425598	0.758615	0.881717
13	2	44459	10.82				6	0.587644	0.541118	39.5665	39.4276	40.8795	38.9017													6	1.47808	1.162				8	0.329562	0.33578	1.37007	1.99416
14	2	52082	10.78				9	0.769703	0.893098	47.0217	48.4974	47.8887	48.0083													9	2.92144	1.58952				16	0.316435	0.395198	2.14941	2.31142
15	2	51983	10.73				15	0.682719	0.902201	53.1758	53.7404	47.7977	51.3028													15	2.581	2.23386				25	0.409016	0.350289	2.71319	2.98987
16	2	681	10.77
17	2	510	10.23				Average																			Average						Average					error bars are the range (low and high value of duplicate experiment)
18	2	535	10.84				Time	ECF PanT	ECF PanT + FolT2 wt	ECF PanT + FolT2 cysless																Time	[3H]folte					Time	PanT	ECF FolT2/PanT
19	2	883	10.66				0.17	0.727222	6.47319	2.58606																0.17	0.393118					0.17	0.187926	0.510025
20	2	892	10.7				3	0.624562	23.9255	23.3977																3	0.897381					3	0.372398	0.820166
21	2	7634	10.45				6	0.564381	39.497	39.8906																6	1.32004					8	0.332671	1.68211
22	2	25779	10.55				9	0.8314	47.7596	47.9485																9	2.25548					16	0.355817	2.23041
23	2	42880	10.78				15	0.79246	53.4581	49.5503																15	2.40743					25	0.379653	2.85153
24	2	52744	11.04
25	2	58446	10.84				Error bars
26	2	2982	10.59				Time	ECF PanT	ECF PanT + FolT2 wt	ECF PanT + FolT2 cysless
27	2	24843	10.52				0.17	-0.0384346	0.546176	0.155853																												CPMA	ECF FolT2 WT
28	2	42308	10.58				3	-0.108729	-0.222056	-0.554911																													Folate	folate 2	pantothenate	pantothenate 2
29	2	52212	10.67				6	-0.023263	-0.0694213	-0.988909																												0.17	682	70	458	351
30	2	55795	10.56				9	0.0616976	0.737889	0.0597667																												1	1685	908	617	588
31	2	11018	10.61				15	0.109741	0.282283	1.75254																												3	1821	1399	578	437
32	2	11445	10.72																																			6	2903	1821	376	929
33	2	11010	10.67																																			15	5028	3374	697	444
34	2	12442	10.51																																			CPPM
35	2	10902	10.56					Pantothenate transport																														0.17	0.213877	0.0239265	0.0783821	0.0600701
36	2	11322	10.65		TC [1/10}		CPMA																															1	0.52842	0.310361	0.105593	0.10063
37	2	743	10.84		6032		Time	ECF PanT		ECF PanT + FolT2 wt		ECF PanT + FolT2 cysless																										3	0.57107	0.478188	0.0989189	0.0747882
38	2	6500	10.74		5397		0.17	743	567	872	950	748	515																									6	0.910388	0.622431	0.0643486	0.158989
39	2	14397	10.81		5447		3	6500	6198	9187	9484	7238	7130																									15	1.57679	1.15326	0.119285	0.0759862
40	2	23846	10.77		5921		8	14397	13819	20372	21688	16330	15660																									AVERAGE CPPM		pmol/ug	average CPPMpmol/ug
41	2	30904	10.77		6046		16	23846	23741	32937	34540	26770	26057																									0.17	0.118902	0.540462	0.0692261	0.314664
42	2	872	10.92		6124		25	30904	30387	39639	39796	33859	35006																									1	0.419391	1.90632	0.103112	0.46869
43	2	9187	10.77		Average:																																	3	0.524629	2.38468	0.0868535	0.394789
44	2	20372	10.64		5827.83		pmol/ug																															6	0.76641	3.48368	0.111669	0.507586
45	2	32937	10.83		1 pmol:		Time	ECF PanT		ECF PanT + FolT2 wt		ECF PanT + FolT2 cysless																										15	1.36503	6.20466	0.0976354	0.443797
46	2	39639	10.75		2913.92		0.17	1.1853	0.904527	1.26463	1.37775	1.08479	0.746884
47	2	748	10.77				3	10.3694	9.88759	13.3235	13.7543	10.497	10.3404
48	2	7238	10.85				8	22.9673	22.0453	29.5447	31.4533	23.6828	22.7111																									TC [1/10]
49	2	16330	10.75				16	38.0412	37.8737	47.7672	50.092	38.8235	37.7894																									folate	folate 1/2	pantothenate
50	2	26770	10.81				25	49.3007	48.476	57.4869	57.7146	49.1044	50.7678																									#DIV/0!	#DIV/0!	#DIV/0!
51	2	33859	10.78
52	2	567	11.34				Average																															#DIV/0!	#DIV/0!	#DIV/0!
53	2	6198	10.93				Time	ECF PanT	ECF PanT + FolT2 wt	ECF PanT + FolT2 cysless
54	2	13819	10.82				0.17	1.04491	1.32119	0.91584
55	2	23741	10.76				3	10.1285	13.5389	10.4187
56	2	30387	10.78				8	22.5063	30.499	23.1969
57	2	950	11.07				16	37.9574	48.9296	38.3065
58	2	9484	11.03				25	48.8884	57.6007	49.9361
59	2	21688	10.89
60	2	34540	10.84				Error bars
61	2	39796	10.85				Time	ECF PanT	ECF PanT + FolT2 wt	ECF PanT + FolT2 cysless
62	2	515	10.95				0.17	-0.140385	0.0565602	-0.168955
63	2	7130	10.81				3	-0.240888	0.215364	-0.0783141
64	2	15660	10.86				8	-0.461038	0.954271	-0.485837
65	2	26057	10.81				16	-0.0837525	1.16238	-0.517018
66	2	35006	10.8				25	-0.412382	0.113845	0.831724
67	2	6032	10.66
68	2	5397	10.67
69	2	5447	10.71
70	2	5921	10.66
71	2	6046	10.75
72	2	6124	10.75
