# Supplementary material for: In vitro reconstitution of dynamically interacting integral membrane subunits of energy-coupling factor transporters
Source: eLife. 2020 Dec 22;9:e64389. doi: 10.7554/eLife.64389 (PMC7755397; doi:10.7554/eLife.64389)
Supplement: Figure 4—source data 1. [file elife-64389-fig4-data1.xlsx]

## Sheet: Guus
S#	Count Time	CPMA	SIS	MESSAGES			Folate transport - CPMA																	Folate transport (pmol/ug ECF PanT)																						S#	Count Time	CPMA	SIS
1	2	1133	11.49				ATP/Mg									ADP/Mg								ATP/Mg									ADP/Mg													1	2	230	11.69
2	2	4448	11.31			Time	ECF PanT/ECF(E>Q)FolT2			ECF PanT			ECF(E>Q)FolT2			ECF PanT/ECF(E>Q)FolT2		ECF PanT		ECF(E>Q)FolT2			Time	ECF PanT/ECF(E>Q)FolT2			ECF PanT			ECF(E>Q)FolT2			ECF PanT/ECF(E>Q)FolT2		ECF PanT		ECF(E>Q)FolT2									2	2	225	11.99
3	2	8048	11.74			0.17	1133	729	998	377	354	400	655	867	553	396	346	577	558	722	680		0.17	0.43338	0.278847	0.381742	0.144205	0.135407	0.153003	0.250542	0.331633	0.211526	0.151473	0.132347	0.220706	0.213439	0.27617	0.260105								3	2	355	10.82
4	2	13899	11.49			3	4448	4716	4215	649	483	579	1180	793	823	679	429	429	386	467	479		3	1.70139	1.8039	1.61227	0.248247	0.184751	0.221471	0.451358	0.303328	0.314803	0.259722	0.164095	0.164095	0.147648	0.178631	0.183221								4	2	437	11.5
5	2	18031	11.28			6	8048	8021	7981	759	570	516	1410	857	836	535	449	421	405	605	535		6	3.07841	3.06809	3.05279	0.290323	0.218029	0.197373	0.539334	0.327808	0.319776	0.204641	0.171746	0.161035	0.154915	0.231417	0.204641								5	2	611	11.37
6	2	729	11.65			12	13899	14016	13506	690	696	535	877	996	914	654	590	469	534	419	433		12	5.31646	5.36121	5.16614	0.26393	0.266225	0.204641	0.335458	0.380977	0.349611	0.250159	0.225679	0.179396	0.204259	0.16027	0.165625								6	2	253	10.96
7	2	4716	11.43			18	18031	19048	18680	803	708	559	1092	1119	1109	443	849	491	507	401	558		18	6.89698	7.28599	7.14523	0.307153	0.270815	0.213821	0.417697	0.428025	0.4242	0.16945	0.324748	0.187811	0.193931	0.153385	0.213439								7	2	431	11.03
8	2	8021	11.49																																											8	2	397	10.87
9	2	14016	11.6																							Average folate transport								Error bars for folate transport												9	2	489	11.19
10	2	19048	11.44									9806			4770	9540			41							ATP			ADP					ATP			ADP									10	2	556	11.01
11	2	998	11.3									9718			9444				9519						Time	ECF PanT/ECF(E>Q)FolT2	ECF PanT	ECF(E>Q)FolT2	ECF PanT/ECF(E>Q)FolT2	ECF PanT	ECF(E>Q)FolT2		Time	ECF PanT/ECF(E>Q)FolT2	ECF PanT	ECF(E>Q)FolT2	ECF PanT/ECF(E>Q)FolT2	ECF PanT	ECF(E>Q)FolT2							11	2	259	11.58
12	2	4215	11.5									6536			4683	9366			54						0.17	0.364656	0.144205	0.264567	0.14191	0.217073	0.268137		0.17	0.0786703	0.00879765	0.0612696	0.0135237	0.00513899	0.0113599							12	2	292	11.37
13	2	7981	11.55									9435			9100										3	1.70585	0.218156	0.356496	0.211909	0.155871	0.180926		3	0.0958958	0.0318776	0.0823527	0.0676183	0.0116303	0.00324568							13	2	365	11.24
14	2	13506	11.52									9351			50										6	3.06643	0.235242	0.395639	0.188193	0.157975	0.218029		6	0.0128941	0.0488067	0.124508	0.0232607	0.00432757	0.0189331							14	2	415	10.82
15	2	18680	11.49									9410			9777				9506.67		4753.33				12	5.28127	0.244932	0.355349	0.237919	0.191827	0.162948		12	0.102189	0.0349116	0.0232953	0.0173103	0.0175808	0.00378662							15	2	573	10.84
16	2	377	11.43																						18	7.1094	0.26393	0.423307	0.247099	0.190871	0.183412		18	0.196964	0.0470452	0.00522137	0.109812	0.00432757	0.0424643							16	2	318	11.42
17	2	649	11.7																																											17	2	488	11.22
18	2	759	11.72				Pantothenate transport - CPMA																	Pantothenate transport (pmol/ug ECF PanT)																						18	2	1049	10.68
19	2	690	11.66				ATP/Mg									ADP/Mg								ATP/Mg									ADP/Mg													19	2	1559	10.92
20	2	803	11.67			Time	ECF PanT/ECF(E>Q)FolT2			ECF PanT			ECF(E>Q)FolT2			ECF PanT/ECF(E>Q)FolT2		ECF PanT		ECF(E>Q)FolT2			Time	ECF PanT/ECF(E>Q)FolT2			ECF PanT			ECF(E>Q)FolT2			ECF PanT/ECF(E>Q)FolT2		ECF PanT		ECF(E>Q)FolT2									20	2	2117	10.68
21	2	354	12.01			0.17	2918	3404	3501	2772	2968	2959	565	313	592	700	594	616	767	1212	811		0.17	0.804613	0.938623	0.96537	0.764354	0.8184	0.815918	0.155794	0.086307	0.163239	0.193019	0.16379	0.169857	0.211493	0.334198	0.223626								21	2	288	11.06
22	2	483	11.45			3	39586	37942	39083	32166	31722	33286	1187	722	776	1002	911	783	720	826	633		3	10.9155	10.4622	10.7768	8.86949	8.74706	9.17832	0.327305	0.199085	0.213975	0.276293	0.2512	0.215905	0.198534	0.227762	0.174544								22	2	730	11.13
23	2	570	12.15			8	80895	82525	83379	73109	70875	71182	995	1771	1170	1568	1440	984	1036	1064	935		8	22.3061	22.7555	22.991	20.1592	19.5432	19.6278	0.274362	0.488338	0.322617	0.432362	0.397067	0.271329	0.285668	0.293389	0.257818								23	2	1241	11.04
24	2	696	11.62			16	109832	113580	114500	104853	106040	108343	1457	1286	1570	2433	2294	1064	1592	1773	1304		16	30.2852	31.3187	31.5724	28.9123	29.2396	29.8746	0.401755	0.354603	0.432914	0.670878	0.63255	0.293389	0.43898	0.488889	0.359566								24	2	1518	10.71
25	2	708	11.54			25	118301	106263	121762	109795	117071	118191	2157	2016	2169	2810	2843	1298	1158	1894	2059		25	32.6205	29.3011	33.5748	30.275	32.2813	32.5901	0.594774	0.555894	0.598082	0.774833	0.783932	0.357912	0.319308	0.522254	0.567751								25	2	1429	10.71
26	2	400	11.81																																											26	2	269	11.64
27	2	579	12.01																							Average pantothenate transport								Error bars for pantothenate transport												27	2	672	10.99
28	2	516	12.09									10914			13401				13556							ATP			ADP					ATP			ADP									28	2	1295	10.61
29	2	535	11.78									8712			1388				13349						Time	ECF PanT/ECF(E>Q)FolT2	ECF PanT	ECF(E>Q)FolT2	ECF PanT/ECF(E>Q)FolT2	ECF PanT	ECF(E>Q)FolT2		Time	ECF PanT/ECF(E>Q)FolT2	ECF PanT	ECF(E>Q)FolT2	ECF PanT/ECF(E>Q)FolT2	ECF PanT	ECF(E>Q)FolT2							29	2	223	11.86
30	2	559	11.77									3109			212				5508	11016					0.17	0.902868	0.799557	0.135113	0.178405	0.190675	0.278912		0.17	0.0861365	0.0305119	0.042431	0.0206677	0.0294417	0.0781863							30	2	2006	10.82
31	2	9806	11.67									9741			2322										3	10.7181	8.93162	0.246788	0.263746	0.207219	0.201153		3	0.232279	0.222242	0.0701256	0.017743	0.0122836	0.0376308							31	2	244	11.08
32	2	9718	11.26									4404			1590										8	22.6842	19.7767	0.361772	0.414715	0.278499	0.275603		8	0.347996	0.333907	0.112233	0.0249572	0.0101389	0.0251522							32	2	288	10.93
33	2	6536	11.81									11578			14054				13187.6		6593.8				16	31.0587	29.3422	0.396424	0.651714	0.366184	0.424228		16	0.681813	0.4893	0.0394265	0.027102	0.102949	0.0914449							33	2	202	11.61
34	2	9435	11.47																						25	31.8321	31.7155	0.582917	0.779382	0.33861	0.545002		25	2.24327	1.25701	0.0234607	0.00643429	0.027297	0.0321714							34	2	252	11.75
35	2	9351	11.39																																											35	2	248	11.13
36	2	9410	11.85																																											36	2	253	12.21
37	2	2918	12.19																																											37	2	209	12.03
38	2	39586	12.19																																											38	2	367	10.92
39	2	80895	12.18																																											39	2	55	13.92
40	2	109832	12.13																																											40	2	352	11.5
41	2	118301	12.2																																											41	2	4979	10.86
42	2	3404	12.08																																											42	2	5104	10.73
43	2	37942	12.19																																											43	2	5021	10.88
44	2	82525	12.18																																											44	2	5305	11.03
45	2	113580	12.17																																											45	2	187	11.78
46	2	106263	11.93																																											46	2	190	11.71
47	2	3501	12.02																																											47	2	160	11.87
48	2	39083	11.98																																											48	2	524	11.14
49	2	83379	12.18																																											49	2	224	12.27
50	2	114500	12.08																																											50	2	131	12.95
51	2	121762	12.1																																											51	2	189	11.59
52	2	2772	12.15																																											52	2	251	12.12
53	2	32166	12.12																																											53	2	212	11.35
54	2	73109	12.17																																											54	2	233	11.63
55	2	104853	12.08																																											55	2	170	11.97
56	2	109795	12.21																																											56	2	183	12.14
57	2	2968	12.05																																											57	2	224	12.26
58	2	31722	12.05																																											58	2	198	11.48
59	2	70875	12.18																																											59	2	189	11.37
60	2	106040	12.26																																											60	2	221	11.67
61	2	117071	12.17																																											61	2	1076	11.25
62	2	2959	12.08																																											62	2	2229	11.12
63	2	33286	12.17																																											63	2	3839	11.08
64	2	71182	12.08																																											64	2	5598	11.21
65	2	108343	12.1																																											65	2	175	11.99
66	2	118191	12.19																																											66	2	1109	11.31
67	2	10914	12.19																																											67	2	2424	11.04
68	2	8712	12.17																																											68	2	3826	11.08
69	2	3109	12.25																																											69	2	5627	11.1
70	2	9741	12.27																																											70	2	214	11.66
71	2	4404	12.24																																											71	2	1171	11.22
72	2	11578	12.34																																											72	2	2386	11.34
73	2	655	12.08																																											73	2	3924	11.11
74	2	1180	11.96																																											74	2	5696	11.11
75	2	1410	11.85																																											75	2	138	12.22
76	2	877	11.83																																											76	2	183	11.55
77	2	1092	11.65																																											77	2	217	12.01
78	2	867	11.56																																											78	2	187	11.06
79	2	793	11.54																																											79	2	258	11.26
80	2	857	11.77																																											80	2	149	12.51
81	2	996	11.9																																											81	2	163	11.97
82	2	1119	11.99																																											82	2	176	12.5
83	2	553	11.62																																											83	2	227	12.14
84	2	823	11.74																																											84	2	173	11.97
85	2	836	11.76																																											85	2	4150	11.24
86	2	914	11.86																																											86	2	4650	11.09
87	2	1109	11.88																																											87	2	5426	11.21
88	2	722	12.16																																											88	2	4958	11.24
89	2	467	11.74																																											89	2	718	11.11
90	2	605	12.26																																											90	2	4715	11.18
91	2	419	11.65																																											91	2	9000	11.27
92	2	401	12.26																																											92	2	11462	11.18
93	2	680	11.76																																											93	2	12619	11.26
94	2	479	12.14																																											94	2	12667	11.29
95	2	535	11.58																																											95	2	674	11.42
96	2	433	12.13																																											96	2	4373	11.17
97	2	558	11.78																																											97	2	8527	11.17
98	2	577	11.7																																											98	2	11632	11.2
99	2	429	11.99																																											99	2	12957	11.19
100	2	421	11.99																																											100	2	12603	11.25
101	2	469	11.66																																											101	2	42	14.46
102	2	491	12.13																																											102	2	50	13.76
103	2	4770	11.85																																											103	2	13212	11.13
104	2	9444	11.45																																											104	2	13567	11.2
105	2	4683	11.76																																											105	2	14057	11.21
106	2	9100	11.69																																											106	2	15076	11.19
107	2	50	13.84																																											107	2	13740	11.22
108	2	9777	11.84																																											108	2	14083	11.13
109	2	565	12.22																																											109	2	15296	11.2
110	2	1187	12.11																																											110	2	16578	11.24
111	2	995	12.29																																											111	2	13250	11.23
112	2	1457	12.32																																											112	2	13277	11.22
113	2	2157	12.09																																											113	2	13580	11.22
114	2	313	12.54																																											114	2	15039	11.3
115	2	722	12.48																																											115	2	12797	11.22
116	2	1771	12.15																																											116	2	12632	11.33
117	2	1286	12.16																																											117	2	14365	11.21
118	2	2016	12.01																																											118	2	14439	11.15
119	2	592	12.11																																											119	2	12816	11.25
120	2	776	12.25																																											120	2	12368	11.2
121	2	1170	12.44																																											121	2	13775	11.37
122	2	1570	12.13																																											122	2	14358	11.41
123	2	2169	12.14																																											123	2	12935	11.27
124	2	1212	12.1																																											124	2	13168	11.25
125	2	826	12.25																																											125	2	13483	11.32
126	2	1064	12.1																																											126	2	14354	11.28
127	2	1773	12.35																																											127	2	12957	11.17
128	2	1894	12.34																																											128	2	13121	11.16
129	2	811	12.45																																											129	2	13106	11.19
130	2	633	12.6																																											130	2	14201	11.13
131	2	935	12.43																																											131	2	4305	11.32
132	2	1304	12.32																																											132	2	4256	11.18
133	2	2059	12.15																																											133	2	4197	11.3
134	2	616	12.34																																											134	2	12575	11.25
135	2	783	12																																											135	2	13206	11.15
136	2	984	12.29																																											136	2	13648	11.06
137	2	1064	12.35																																											137	2	14643	11.22
138	2	1298	12.09																																											138	2	13378	11.1
139	2	13401	12.26																																											139	2	13999	11.12
140	2	1388	12.43																																											140	2	14899	11.21
141	2	212	12.97																																											141	2	15724	11.26
142	2	2322	12.34																																											142	2	12671	11.19
143	2	1590	12.28																																											143	2	12287	11.13
144	2	14054	12.34																																											144	2	13808	11.17
145	2	767	12.06																																											145	2	14556	11.13
146	2	720	12.14																																											146	2	8280	11.23
147	2	1036	12.28																																											147	2	7909	11.11
148	2	1592	12.09																																											148	2	9169	11.16
149	2	1158	12.12																																											149	2	9949	11.28
150	2	700	12.28																																											150	2	11246	11.25
151	2	1002	12.12																																											151	2	11528	11.21
152	2	1568	11.91																																											152	2	12610	11.22
153	2	2433	12.27																																											153	2	13335	11.21
154	2	2810	12.08																																											154	2	11106	11.26
155	2	594	12.07																																											155	2	11577	11.21
156	2	911	12.07																																											156	2	12043	11.23
157	2	1440	12.16																																											157	2	11669	11.26
158	2	2294	12.25																																											158	2	11254	11.18
159	2	2843	11.95																																											159	2	11521	11.18
160	2	396	12.08																																											160	2	11754	11.15
161	2	679	11.89																																											161	2	12741	11.19
162	2	535	11.35																																											162	2	4215	11.19
163	2	654	11.93																																											163	2	4110	11.21
164	2	443	11.92																																											164	2	4189	11.21
165	2	346	11.92
166	2	429	12.17
167	2	449	12.23
168	2	590	11.93
169	2	849	12.09
170	2	558	11.95
171	2	386	12.15
172	2	405	11.77
173	2	534	12.18
174	2	507	11.81
175	2	13556	12.23
176	2	13349	12.2
177	2	5508	12.19
178	2	41	14.4
179	2	9519	11.52
180	2	54	14.08
[truncated: 3 more columns]
