# Supplementary material for: In vitro reconstitution of dynamically interacting integral membrane subunits of energy-coupling factor transporters
Source: eLife. 2020 Dec 22;9:e64389. doi: 10.7554/eLife.64389 (PMC7755397; doi:10.7554/eLife.64389)
Supplement: Figure 5—source data 1. [file elife-64389-fig5-data1.xlsx]

## Sheet: Guus
S#	Count Time	CPMA	SIS	MESSAGES																																										S#	Count Time	CPMA	SIS
1	2	687	11.86				CPMA																																							1	2	580	11.89
2	2	3704	11.58				ECF PanT 1:1000																																							2	2	1500	11.58
3	2	8451	11.61				Mg-ATP						Mg-ADP						Mg-ATP			Mg-ADP																								3	2	2520	11.71
4	2	14038	11.61				Pantothenate			pantothenate + 50 uM folate			Pantothenate			pantothenate + 50 uM folate			Folate			Folate																								4	2	2879	11.6
5	2	18807	11.62				688	704	714	501	844	838	403	376	416	501	595	426	769	809	561	582	479	548																						5	2	3653	11.59
6	2	694	11.74				3747	4711	4271	4269	4256	4032	1077	695	1103	1287	955	1998	777	906	655	662	720	1975																						6	2	525	11.6
7	2	4761	11.72				8404	8893	9254	9168	9545	9346	1292	756	704	2308	820	838	841	651	906	848	884	942																						7	2	1558	11.66
8	2	8867	11.62				14128	15560	15848	15697	15918	15425	767	750	830	971	977	852	662	647	779	911	984	1105																						8	2	2089	11.57
9	2	15070	11.71				19012	20605	21144	20249	21978	21880	918	887	1498	1049	1590	782	1472	1299	912	782	774	915																						9	2	2561	11.41
10	2	19934	11.63																																											10	2	3451	11.58
11	2	663	11.79																																											11	2	869	11.85
12	2	4223	11.47					6069	6691	7161																																				12	2	1505	11.55
13	2	9032	11.62					6789	7174	6956																																				13	2	2297	11.7
14	2	15388	11.66					7428	7094	7214																																				14	2	2910	11.74
15	2	20697	11.63					7122	7921	6981																																				15	2	3667	11.5
16	2	439	11.84					7529	8009	6738																																				16	2	292	11.94
17	2	4161	11.72					6903	7363	7005																																				17	2	937	11.69
18	2	8781	11.64																																											18	2	1317	11.51
19	2	15429	11.57					7174.33		7009.17																																				19	2	1643	11.58
20	2	19730	11.66																																											20	2	2076	11.58
21	2	847	11.83				Transport (pmol substrate/ug protein)																																							21	2	293	12.34
22	2	4245	11.63				ECF PanT 1:1000																																							22	2	886	11.7
23	2	9198	11.73				Mg-ATP						Mg-ADP						Mg-ATP			Mg-ADP																								23	2	1513	11.58
24	2	15641	11.73				Pantothenate			pantothenate + 50 uM folate			Pantothenate			pantothenate + 50 uM folate			Folate			Folate																								24	2	1625	11.86
25	2	21332	11.68				0.39378	0.402938	0.408662	0.28675	0.483068	0.479634	0.230659	0.215206	0.2381	0.28675	0.340551	0.243823	0.477356	0.502186	0.34824	0.361276	0.297339	0.34017																						25	2	1932	11.56
26	2	783	11.65				2.14462	2.69637	2.44453	2.44338	2.43594	2.30774	0.616427	0.397787	0.631308	0.736621	0.546599	1.14357	0.482322	0.562398	0.40659	0.410936	0.446939	1.22598																						26	2	246	12.12
27	2	4034	11.7				4.81007	5.08996	5.29658	5.24735	5.46313	5.34923	0.739483	0.432701	0.402938	1.321	0.469331	0.479634	0.52205	0.404107	0.562398	0.526395	0.548742	0.584745																						27	2	998	11.81
28	2	9329	11.74				8.08623	8.90585	9.07069	8.98426	9.11075	8.82858	0.438996	0.429266	0.475055	0.555757	0.559191	0.487647	0.410936	0.401624	0.483563	0.565502	0.610817	0.685927																						28	2	1379	11.6
29	2	15010	11.65				10.8816	11.7934	12.1019	11.5896	12.5792	12.5231	0.525422	0.507679	0.857388	0.600401	0.910045	0.447582	0.913742	0.806352	0.566123	0.485425	0.480459	0.567985																						29	2	1782	11.84
30	2	20763	11.6																																											30	2	2239	11.53
31	2	5947	11.64				Average									Standard deviation																														31	2	338	12.2
32	2	6429	11.7				Mg-ATP		Mg-ADP			Mg-ATP	Mg-ADP			Mg-ATP		Mg-ADP			Mg-ATP	Mg-ADP																								32	2	532	12.04
33	2	7268	11.83			Time	Pantothenate	Pantothenate + 50 uM folate	Pantothenate	Pantothenate + 50 uM folate	Time	Folate	Folate		Time	Pantothenate	Pantothenate + 50 uM folate	Pantothenate	Pantothenate + 50 uM folate	Time	Folate	Folate																								33	2	447	12.02
34	2	6948	11.77			0.17	0.401793	0.416484	0.227988	0.290375	0.17	0.442594	0.332928		0.17	0.00750637	0.112366	0.0116785	0.0484658	0.17	0.0826505	0.032578																								34	2	442	11.75
35	2	7309	11.8			3	2.4285	2.39569	0.548507	0.808929	3	0.48377	0.694618		3	0.276224	0.0762594	0.130739	0.304981	3	0.077914	0.460524																								35	2	437	11.55
36	2	6935	11.65			8	5.06553	5.35324	0.525041	0.756654	6	0.496185	0.553294		8	0.244169	0.107945	0.186308	0.488762	6	0.0822541	0.0294403																								36	2	8524	11.88
37	2	373	11.8			16	8.68759	8.97453	0.447773	0.534198	9	0.432041	0.620749		16	0.52727	0.141337	0.0241228	0.0403514	9	0.0448617	0.0608239																								37	2	9260	11.98
38	2	1028	11.61			25	11.5923	12.2307	0.630163	0.652676	15	0.762072	0.51129		25	0.634497	0.555863	0.196983	0.235622	15	0.17799	0.0491621																								38	2	7189	11.81
39	2	1181	11.72																																											39	2	8218	11.99
40	2	722	11.73																																											40	2	374	11.98
41	2	940	11.61																																											41	2	790	11.81
42	2	396	11.91																																											42	2	1118	11.85
43	2	678	11.68																																											43	2	1342	11.71
44	2	722	11.71																																											44	2	1732	11.69
45	2	773	11.83																																											45	2	427	12.04
46	2	898	11.46																																											46	2	851	11.73
47	2	407	12.14																																											47	2	1108	11.98
48	2	1027	11.39																																											48	2	1332	11.81
49	2	654	11.7																																											49	2	1704	11.53
50	2	775	11.65																																											50	2	431	12.07
51	2	1238	11.35																																											51	2	782	12.04
52	2	534	11.48																																											52	2	1135	12.1
53	2	1270	11.56																																											53	2	1428	11.78
54	2	2251	11.53																																											54	2	1754	11.72
55	2	950	11.68																																											55	2	635	12.23
56	2	1023	11.69																																											56	2	884	12.08
57	2	565	11.8																																											57	2	1318	12.08
58	2	919	11.44																																											58	2	1715	11.81
59	2	812	11.83																																											59	2	1974	11.74
60	2	954	11.57				CPMA																															CPMA								60	2	484	11.99
61	2	1538	11.74				ECF PanT 1:1000 FolT2 1:250																															FolT2 1:250								61	2	952	11.84
62	2	408	11.91				Mg-ATP																								Mg-ADP															62	2	1328	11.76
63	2	1940	11.43				Pantothenate			pantothenate + 0.5 uM folate			pantothenate + 5 uM folate			pantothenate + 50 uM folate			Folate			Folate + 0.5 uM pantothenate			Folate + 5 uM pantothenate			Folate + 50 uM pantothenate			Pantothenate			Folate				Pantothenate		Folate						63	2	1485	11.54
64	2	842	11.35				1283	1200	1224	1822	2778	1937	1177	1135	1257	1117	1824	1286	8550	8844	9221	6558	6398	6654	9348	9417	9238	9482	9106	9827	878	594	785	2997	3037	3350		500	405	4339	4834					64	2	2112	12.06
65	2	806	11.38				10086	10376	10546	13984	13802	13788	4462	4880	4485	3612	3591	3438	22137	22686	22587	16136	15765	15764	23322	20762	20971	20647	21109	20798	1096	969	771	4476	4652	4502		635	487	6157	6123					65	2	486	11.89
66	2	745	11.41				23767	23527	22772	33652	33067	33258	9736	10532	10026	7177	6413	6901	35437	35694	35138	24182	22908	23017	27347	31266	31535	30400	31336	30480	1074	1307	1026	5312	5192	4911		531	612	6349	6993					66	2	852	11.81
67	2	6435	11.56				39328	39026	39943	57270	56589	54030	19153	19567	18684	11272	10682	11328	47101	45025	44758	30531	28198	28740	38104	40478	39182	40187	39739	40320	1497	1373	1392	5708	5197	5221		532	590	6744	7559					67	2	1283	11.87
68	2	7043	11.59				50297	49614	51052	76962	68824	72550	29128	29993	25990	15276	14128	14726	63060	62335	61485	42479	37977	40497	56046	53951	53609	54801	51	53611	1743	1640	1779	5757	5722	5469		835	561	6200	6571					68	2	1572	11.7
69	2	6907	11.73																																											69	2	2140	11.89
70	2	7967	11.7																																											70	2	8020	11.91
71	2	7562	11.48																																											71	2	8958	11.96
72	2	7114	11.52				6944	14999	7715	7337	6815	5100	6867	7286	6934	6879	7450	7439																												72	2	8504	12
73	2	652	11.52				6927	15109	7507	7002	6638	4350	6938	7285	7280	7565	7529	7464																												73	2	8059	11.98
74	2	717	11.29				6894	14584	7901	7132	7570	5045		7136	7091		7248																													Missing vial 74.
75	2	726	11.64																																											75	2	1249	12.14
76	2	622	11.63																																											76	2	13730	12.19
77	2	1299	11.21				6921.67	14897.3	7707.67	7157	7007.67	4831.67	6902.5	7235.67	7101.67	7222	7409	7451.5																												77	2	27022	12.17
78	2	745	11.59					7840.7																																						78	2	46588	12.11
79	2	883	11.74																																											79	2	60720	12.21
80	2	595	11.44																																											80	2	1101	12.35
81	2	581	10.89				Transport (pmol substrate/ug protein)																															CPMA								81	2	13967	12.21
82	2	1202	11.13				ECF PanT 1:1000 FolT2 1:250																															FolT2 1:250								82	2	30107	12.18
83	2	549	11.22				Mg-ATP																								Mg-ADP															83	2	49586	12.08
84	2	617	11.43				Pantothenate			pantothenate + 0.5 uM folate			pantothenate + 5 uM folate			pantothenate + 50 uM folate			Folate			Folate + 0.5 uM pantothenate			Folate + 5 uM pantothenate			Folate + 50 uM pantothenate			Pantothenate			Folate				Pantothenate		Folate						84	2	66545	12.28
85	2	841	11.35				0.74144	0.693475	0.707344	0.929509	1.41722	0.988177	0.61082	0.589024	0.652337	0.624284	1.01942	0.718737	4.88037	5.04819	5.26338	5.42918	5.29672	5.50866	5.41717	5.45715	5.35342	5.24181	5.03395	5.43253	0.494532	0.334569	0.44215	1.61803	1.63963	1.80861		0.276932	0.224315	2.3292	2.59491					85	2	1244	11.88
86	2	728	11.36				5.82865	5.99624	6.09449	7.13406	7.04121	7.03406	2.31562	2.53254	2.32755	2.01872	2.00699	1.92148	12.6359	12.9492	12.8927	13.3585	13.0514	13.0506	13.5151	12.0316	12.1527	11.414	11.6694	11.4975	0.61732	0.545787	0.434264	2.41652	2.51154	2.43056		0.351703	0.269731	3.30511	3.28685					86	2	13072	12.13
87	2	864	11.22				13.7348	13.5961	13.1598	17.1679	16.8694	16.9668	5.05263	5.46573	5.20313	4.01118	3.58418	3.85692	20.2276	20.3743	20.0569	20.0196	18.9649	19.0551	15.8476	18.1187	18.2745	16.8056	17.3231	16.8499	0.604928	0.736165	0.577893	2.86786	2.80308	2.65137		0.294101	0.338964	3.40817	3.75388					87	2	30776	12.08
88	2	577	11.64				22.7275	22.5529	23.0829	29.2168	28.8694	27.5639	9.93971	10.1546	9.69632	6.29985	5.9701	6.33114	26.8854	25.7004	25.548	25.2758	23.3443	23.793	22.0813	23.457	22.706	22.2161	21.9684	22.2896	0.843182	0.77334	0.784041	3.08166	2.80578	2.81873		0.294655	0.326779	3.62021	4.05771					88	2	47864	12.2
89	2	645	11.58				29.0664	28.6717	29.5027	39.2628	35.1111	37.012	15.1164	15.5653	13.4879	8.53766	7.89605	8.23026	35.9949	35.581	35.0958	35.1672	31.4401	33.5263	32.4787	31.2646	31.0664	30.2949		29.6371	0.981741	0.923727	1.00202	3.10811	3.08922	2.95263		0.462476	0.310717	3.32819	3.52734					89	2	64056	12.24
90	2	838	11.21																																											90	2	1121	12.26
91	2	801	11.33																																											91	2	13247	12.16
92	2	675	11.2																																											92	2	28324	12.14
93	2	449	11.67					Average pantothenate transport						Standard deviation							Average folate transport						Standard deviation																			93	2	45510	12.11
94	2	699	11.4					Mg-ATP				Mg-ADP		Mg-ATP				Mg-ADP			Mg-ATP				Mg-ADP		Mg-ATP				Mg-ADP							FolT2 1:250								94	2	59052	12.08
95	2	755	11.47				Time	Pantothenate	Pantothenate + 0.5 uM folate	Pantothenate + 5 uM folate	Pantothenate + 50 uM folate	Pantothenate	Time	Pantothenate	Pantothenate + 0.5 uM folate	Pantothenate + 5 uM folate	Pantothenate + 50 uM folate	Pantothenate		Time	Folate	Folate+ 0.5 uM pantothenate	Folate + 5 uM pantothenate	Folate + 50 uM pantothenate	Folate	Time	Folate	Folate+ 0.5 uM pantothenate	Folate + 5 uM pantothenate	Folate + 50 uM pantothenate	Folate						Time	Pantothenate	Stdev	Time	Folate	Stdev				95	2	1228	12.06
96	2	928	11.3				0.17	0.714086	1.11164	0.617394	0.787481	0.42375	0.17	0.0246832	0.266265	0.0321646	0.206344	0.0815531		0.17	5.06398	5.41152	5.40925	5.2361	1.68876	0.17	0.191992	0.107066	0.0523168	0.199352	0.104357						0.17	0.250623	0.0372058	0.17	2.46205	0.187891				96	2	12829	12.11
97	2	656	11.14				3	5.97313	7.06978	2.3919	1.98239	0.532457	3	0.134415	0.0557825	0.121943	0.0530831	0.092253		3	12.826	13.1535	12.5665	11.527	2.45287	3	0.167019	0.177567	0.823777	0.130228	0.0512899						3	0.310717	0.0579628	3	3.29598	0.0129057				97	2	28139	11.76
98	2	518	11.31				8	13.4969	17.0014	5.2405	3.81743	0.639662	8	0.300065	0.152187	0.209067	0.21622	0.0846604		6	20.2196	19.3465	17.4136	16.9929	2.7741	6	0.158834	0.58463	1.35844	0.286829	0.111117						8	0.316533	0.0317229	6	3.58102	0.244448				98	2	43717	11.92
99	2	1872	11.36				16	22.7878	28.55	9.9302	6.20036	0.800188	16	0.270061	0.871506	0.229271	0.200028	0.0376169		9	26.0446	24.1377	22.7481	22.158	2.90206	9	0.732125	1.01079	0.688833	0.168277	0.155674						16	0.310717	0.0227151	9	3.83896	0.309356				99	2	60353	12.28
100	2	859	11.21				25	29.0803	37.1286	14.7232	8.22132	0.969162	25	0.41568	2.07829	1.0931	0.320898	0.0406333		15	35.5572	33.3779	31.6032	29.966	3.04998	15	0.449979	1.86797	0.764595	0.465172	0.0848431						25	0.386597	0.107309	15	3.42777	0.140824				100	2	1261	12.23
101	2	925	10.92																																											101	2	12833	12.19
102	2	812	11.11																																											102	2	27427	12.14
103	2	6502	11.09																																											103	2	43597	12.13
104	2	6615	11.05																																											104	2	60514	12.29
105	2	6143	10.71																																											105	2	365	12.98
106	2	6357	11.05																																											106	2	550	12.25
107	2	6430	11.19																																											107	2	740	12.21
108	2	6616	11.14																																											108	2	584	12.03
109	2	1287	11.8																																											109	2	690	12.23
110	2	9744	11.58																																											110	2	12351	12.12
111	2	23145	11.63																																											111	2	13359	12.01
112	2	37999	11.68																																											112	2	12707	11.83
113	2	48752	11.52																																											113	2	12270	12.07
114	2	1168	11.93																																											114	2	1107	12.06
115	2	9996	11.61																																											115	2	8531	12.18
116	2	22438	11.56																																											116	2	15786	12.21
117	2	37352	11.68																																											117	2	31454	12.06
118	2	46878	11.58																																											118	2	43080	12.33
119	2	1216	11.9																																											119	2	1344	12.5
120	2	10154	11.63																																											120	2	8243	12.22
121	2	21908	11.52																																											121	2	18000	12.25
122	2	38053	11.63																																											122	2	29290	12.2
123	2	49431	11.72																																											123	2	40368	12.39
124	2	1774	11.71																																											124	2	1282	12.27
125	2	13683	11.63																																											125	2	8394	12.15
126	2	32825	11.77																																											126	2	18782	12.33
127	2	55546	11.68																																											127	2	30480	12.24
128	2	74915	11.7																																											128	2	41317	12.25
129	2	2712	11.57																																											129	2	1107	12.38
130	2	13176	11.59																																											130	2	4925	12.01
131	2	31817	11.66																																											131	2	9494	12.24
132	2	55554	11.66																																											132	2	15259	12.23
133	2	67532	11.66																																											133	2	19206	12.24
134	2	1845	11.81																																											134	2	1262	12.04
135	2	13446	11.63																																											135	2	5108	12.22
136	2	32566	11.78																																											136	2	9509	12.18
137	2	52881	11.68																																											137	2	15052	12.25
138	2	70350	11.67																																											138	2	18963	12.38
139	2	6861	11.78																																											139	2	1081	12.18
140	2	6706	11.54																																											140	2	4826	12.39
141	2	6794	11.74																																											141	2	9091	12.2
142	2	14167	11.55																																											142	2	14142	12.27
143	2	14709	11.77																																											143	2	18741	12.26
144	2	14464	11.6																																											144	2	12537	12.25
145	2	1026	11.74																																											145	2	13432	12.18
146	2	4095	11.57																																											146	2	12753	12.26
147	2	9309	11.64																																											147	2	13289	12.19
148	2	18519	11.54
149	2	28350	11.68
150	2	1087	11.69
151	2	4717	11.44
152	2	10331	11.52
153	2	19033	11.55
154	2	28717	11.62
155	2	1149	11.54
156	2	4360	11.6
157	2	9766	11.53
158	2	18133	11.64
159	2	25442	11.66
160	2	1092	11.73
161	2	3547	11.77
162	2	6951	11.56
163	2	9516	10.71
164	2	15166	11.58
165	2	1741	11.76
166	2	3585	11.74
167	2	6168	11.07
168	2	10588	11.62
169	2	13845	11.62
170	2	1205	11.2
171	2	3363	11.59
172	2	6769	11.67
173	2	11078	11.63
174	2	14619	11.63
175	2	7555	11.6
176	2	7355	11.74
177	2	7739	11.74
178	2	7205	11.58
179	2	6813	11.44
180	2	6897	11.53
181	2	7523	11
182	2	19581	10.77
183	2	30741	10.79
184	2	41555	10.93
185	2	56818	10.99
186	2	7642	10.71
187	2	19255	10.83
188	2	30834	10.91
189	2	40058	10.96
190	2	55695	10.88
191	2	8759	11.17
192	2	19848	10.83
193	2	32067	11.05
194	2	38268	10.82
195	2	53319	10.89
196	2	5834	10.9
197	2	14460	10.91
198	2	21622	11
199	2	27457	10.93
200	2	37336	10.89
201	2	5881	11.03
202	2	14465	10.99
203	2	20256	10.84
204	2	25621	10.85
205	2	35219	11.11
206	2	6217	11.13
207	2	14445	11.07
208	2	21297	11.03
209	2	26902	11.15
210	2	36593	11.06
211	2	6126	10.82
212	2	6183	10.98
213	2	6874	11.02
214	2	4483	10.73
215	2	3877	10.84
216	2	4800	11.18
217	2	8588	10.98
218	2	20672	10.84
219	2	35612	11.22
220	2	24609	11.09
221	2	49833	11.04
222	2	8549	11
223	2	17953	11.05
224	2	28878	11.16
225	2	36788	11.14
226	2	48856	11.08
227	2	8363	11.04
228	2	18974	10.92
229	2	29042	11.15
230	2	34134	10.86
231	2	48856	11.14
232	2	8743	11.01
233	2	19458	11.21
234	2	19491	11.61
235	2	36491	11.07
236	2	50091	11.11
237	2	8399	11.01
238	2	18674	10.92
239	2	28599	11.05
240	2	35545	11.02
241	2	56	14.34
242	2	8927	11.15
243	2	18892	10.98
244	2	27966	11.17
245	2	38951	11.38
246	2	49283	11.13
247	2	67	14.52
248	2	6435	11.2
249	2	6565	11.16
250	2	6791	10.96
251	2	6981	11.4
252	2	6841	11.6
253	2	869	11.74
254	2	985	11.4
255	2	1038	11.78
256	2	1558	11.26
257	2	1724	11.73
258	2	588	11.31
259	2	909	11.57
260	2	1291	11.67
261	2	1423	11.46
262	2	1565	11.62
263	2	786	11.3
264	2	746	11.79
265	2	992	11.54
266	2	1379	11.76
267	2	1706	11.64
268	2	470	11.54
269	2	619	11.67
270	2	529	11.8
271	2	501	11.58
272	2	794	11.67
273	2	399	11.9
274	2	453	11.71
275	2	609	11.35
276	2	581	11.69
277	2	517	11.71
278	2	6939	11.5
279	2	7113	11.51
280	2	7076	11.37
281	2	6810	11.58
282	2	7209	11.67
283	2	2952	10.94
284	2	4174	10.97
285	2	4839	10.95
286	2	5064	10.86
287	2	5186	10.99
288	2	2805	10.98
289	2	4343	11.02
290	2	4833	10.93
291	2	4919	10.77
292	2	5483	11.18
293	2	2989	10.82
294	2	4198	10.97
295	2	4655	10.97
296	2	4891	11.01
297	2	5248	11.15
298	2	3944	10.97
299	2	5693	10.89
300	2	6102	11.09
301	2	6521	11.17
302	2	5995	11.21
303	2	4622	11.12
304	2	5912	11.01
305	2	6425	10.94
306	2	7300	10.96
307	2	6141	11.11
308	2	7025	10.98
309	2	6732	10.91
310	2	6600	10.77
311	2	6991	11.01
312	2	7297	11.22				CPMA
313	2	204	11.87				ECF PanT 1:1000 FolT2 1:1000
314	2	5549	11.23				Mg-ATP																								Mg-ADP
315	2	9299	11.23				Pantothenate			pantothenate + 0.5 uM folate			pantothenate + 5 uM folate			pantothenate + 50 uM folate			Folate			Folate + 0.5 uM pantothenate			Folate + 5 uM pantothenate			Folate + 50 uM pantothenate			Pantothenate			Folate
316	2	12692	11.04				1182	945	1023	1618	1230	388	1184	1793	792	980	930	745	2361	2491	2813	1798	1732	1804	304	214	230	208	162	108	1024	2430	1534	571	375	417
317	2	16500	11.29				4592	4435	4727	6227	6577	5876	3219	3226	2706	2723	1640	1569	5684	6145	3435	3599	3284	2808	6255	7432	5783	5965	5892	5749	354	559	472	130	94	89
318	2	149	12.37				8526	8587	8342	12210	11205	10996	5953	5625	4966	4611	2828	2695	8045	7737	4624	5436	5077	3932	9635	10122	9184	9704	9252	9129	470	554	455	105	84	101
319	2	5652	10.99				13525	13453	12750	17398	16761	16527	9038	7842	7513	6683	4285	3991	6233	10328	6151	6606	6186	5130	12551	12857	11258	13382	12996	11423	535	518	870	98	79	99
320	2	8358	10.82				15649	16190	15936	21190	21584	20813	10858	9323	8916	8165	4966	4672	15603	13292	8372	9338	8255	6860	17137	16173	15740	17269	17392	15797	88	644	756	107	581	102
321	2	11764	11.1
322	2	16183	11.09
323	2	109	12.16
324	2	5240	10.96				6967	14764	7529	7205	7527	6606	7309	4982	2158
325	2	8594	11.08				7201	14562	7240	6813	7195	7137	7128	6631	2271
326	2	10991	11.11				6907	14177	6025	6897		5580	5576	5469	2190
327	2	14096	10.87
328	2	285	12
329	2	5652	11				7025	14501	6931.33	6971.67	7361	6441	6671	5694	2206.33
330	2	8840	10.92					7632.11
331	2	11696	11.01
332	2	15975	11.14
333	2	216	11.44				Transport (pmol substrate/ug protein)
334	2	6871	11.11				ECF PanT 1:1000 FolT2 1:250
335	2	9584	11.28				Mg-ATP																								Mg-ADP
336	2	11192	10.74				Pantothenate			pantothenate + 0.5 uM folate			pantothenate + 5 uM folate			pantothenate + 50 uM folate			Folate			Folate + 0.5 uM pantothenate			Folate + 5 uM pantothenate			Folate + 50 uM pantothenate			Pantothenate			Folate
337	2	15328	11.24				0.118434	0.092242	0.0614947	0.159327	0.112158	0.120543	0.683274	1.03472	0.457055	0.562276	0.533588	0.427444	1.28298	1.35362	1.5286	1.1166	1.07561	1.12032	0.182282	0.128317	0.13791	0.146119	0.113804	0.0758693	0.576766	1.34589	0.828182	1.0352	0.679861	0.756005
338	2	229	11.97				3.39644	3.35488	3.27345	3.27826	3.89512	3.03088	1.85765	1.86169	1.5616	1.56232	0.940951	0.900215	3.08871	3.33922	2.6879	2.23506	2.03943	2.2757	3.75056	4.4563	3.46755	4.19038	4.13909	4.03864	0.641789	1.01345	0.855718	0.235685	0.170418	0.161354
339	2	5399	10.98				5.52541	5.26804	5.19801	5.04972	5.30496	4.81335	3.43541	3.24613	2.86583	2.64557	1.62257	1.54626	4.37169	4.20432	3.61829	3.37587	3.15293	3.18662	5.77724	6.06925	5.50682	6.817	6.49947	6.41307	0.852092	1.00438	0.824898	0.190361	0.152289	0.183109
340	2	8819	11.24				7.61964	7.39986	6.5042	6.578	6.73838	5.90034	5.21574	4.52554	4.33567	3.83438	2.45852	2.28984	3.38704	5.61228	4.81317	4.10247	3.84164	4.15752	7.52571	7.70919	6.75041	9.40077	9.12961	8.02459	0.969935	0.939115	1.57728	0.17767	0.143224	0.179483
341	2	11034	11.28				9.83288	9.90292	8.99473	8.98153	8.4763	8.24936	6.26604	5.38021	5.14533	4.68468	2.84925	2.68056	8.47874	7.22293	6.55111	5.7991	5.12653	5.55957	10.2755	9.6975	9.43787	12.1314	12.2178	11.0973	0.159541	1.16755	1.3706	0.193987	1.05333	0.184922
342	2	15130	11.23
343	2	6927	11.19
344	2	6885	11.27
345	2	4812	10.33					Average pantothenate transport						Standard deviation							Average pantothenate transport						Standard deviation
346	2	4982	9.93					Mg-ATP				Mg-ADP		Mg-ATP				Mg-ADP			Mg-ATP				Mg-ADP		Mg-ATP				Mg-ADP
347	2	6631	11.13				Time	Pantothenate	Pantothenate + 0.5 uM folate	Pantothenate + 5 uM folate	Pantothenate + 50 uM folate	Pantothenate	Time	Pantothenate	Pantothenate + 0.5 uM folate	Pantothenate + 5 uM folate	Pantothenate + 50 uM folate	Pantothenate		Time	Folate	Folate+ 0.5 uM pantothenate	Folate + 5 uM pantothenate	Folate + 50 uM pantothenate	Folate	Time	Folate	Folate+ 0.5 uM pantothenate	Folate + 5 uM pantothenate	Folate + 50 uM pantothenate	Folate
348	2	5469	11.39				0.17	0.0907236	0.130676	0.725017	0.50777	0.916945	0.17	0.0285001	0.0251642	0.291087	0.071027	0.392169		0.17	1.3884	1.10418	0.149503	0.111931	0.823689	0.17	0.126449	0.0248098	0.0287896	0.0351621	0.18709
1	2	1181	11.64				3	3.34159	3.40142	1.76032	1.1345	0.836984	3	0.0625618	0.445091	0.172101	0.371068	0.186536		3	3.03861	2.1834	3.89147	4.1227	0.189152	3	0.32854	0.126319	0.509217	0.0771859	0.0405526
2	2	4572	11.58				8	5.33049	5.05601	3.18246	1.93813	0.893791	8	0.172402	0.245864	0.290083	0.613843	0.0967348		6	4.06477	3.23847	5.78444	6.57651	0.175253	6	0.395611	0.120178	0.281286	0.212702	0.0202154
3	2	8487	11.54				16	7.17457	6.40557	4.69232	2.86091	1.16211	16	0.590865	0.444833	0.463129	0.847253	0.359877		9	4.60416	4.03388	7.32844	8.85166	0.166793	9	1.12725	0.168743	0.508921	0.728982	0.0204311
4	2	13628	11.53				25	9.57684	8.56906	5.59719	3.40483	0.899229	25	0.505338	0.374797	0.591023	1.11158	0.648585		15	7.41759	5.49507	9.80363	11.8155	0.477414	15	0.978447	0.340891	0.428794	0.623463	0.49878
5	2	15848	11.57
6	2	945	11.59
7	2	4474	11.62
8	2	8596	11.31
9	2	13512	11.52
10	2	16322	11.55
11	2	993	11.43
12	2	4732	11.5
13	2	8205	11.46
14	2	12744	11.6
15	2	15938	11.65
16	2	1593	11.54
17	2	6335	11.63
18	2	12348	11.5
19	2	17549	11.51
20	2	21209	11.54
21	2	1222	11.83
22	2	6604	11.55
23	2	11280	11.44
24	2	16741	11.5
25	2	21664	11.45
26	2	375	12.1
27	2	5896	11.54
28	2	11098	11.42
29	2	16609	11.48
30	2	20752	11.59
31	2	7037	11.64
32	2	7298	11.52
33	2	6946	11.52
34	2	14881	11.36
35	2	14679	11.45
36	2	14309	11.5
37	2	1162	11.61
38	2	3286	11.62
39	2	5921	11.54
40	2	9024	11.53
41	2	11146	11.48
42	2	1854	11.64
43	2	3246	11.47
44	2	5717	11.6
45	2	7982	11.44
46	2	9466	11.33
47	2	753	11.63
48	2	2723	11.65
49	2	4985	11.41
50	2	7501	11.5
51	2	8770	11.41
52	2	1014	11.66
53	2	2677	11.6
54	2	4552	11.49
55	2	6599	11.5
56	2	8336	11.42
57	2	935	11.46
58	2	1604	11.41
59	2	2851	11.47
60	2	4324	11.56
61	2	5019	11.56
62	2	741	11.52
63	2	1564	11.61
64	2	2686	11.63
65	2	3924	11.52
66	2	4783	11.53
67	2	7529	11.46
68	2	7240	11.46
69	2	3446	11.52
70	2	6025	11.45
71	2	1424	11.62
72	2	1350	11.5
73	2	2181	11.37
74	2	5584	11.26
75	2	7904	11.45
76	2	6200	11.36
77	2	15413	11.43
78	2	2356	11.44
79	2	6011	11.39
80	2	7343	11.24
81	2	10124	11.38
82	2	13397	11.43
83	2	2791	11.43
84	2	3356	11.41
85	2	4565	11.31
86	2	6017	11.27
87	2	8027	11.25
88	2	1764	11.25
89	2	3390	11.06
90	2	5192	11.49
91	2	6533	11.46
92	2	9320	11.47
93	2	1615	11.26
94	2	3096	11.23
95	2	4890	11.17
96	2	6042	11.25
97	2	8090	11.45
98	2	1736	11.65
99	2	2858	11.46
100	2	3946	11.65
101	2	5111	11.59
102	2	6798	11.26
103	2	6645	11.55
104	2	6513	11.56
105	2	2220	11.61
106	2	4027	11.41
107	2	3941	11.53
108	2	2522	11.49
109	2	538	11.71
110	2	106	12.27
111	2	87	12.58
112	2	105	11.88
113	2	105	12.42
114	2	376	11.8
115	2	82	12.67
116	2	88	13.42
117	2	78	13.38
118	2	528	11.62
119	2	413	11.5
120	2	89	11.77
121	2	84	12.91
122	2	84	11.99
123	2	94	12.03
124	2	848	10.99
125	2	350	11.58
126	2	480	11.42
127	2	522	11.42
128	2	79	11.6
129	2	1802	10.45
130	2	506	11.62
131	2	489	11.34
132	2	502	11.49
133	2	633	11.72
134	2	1340	10.85
135	2	421	11.4
136	2	456	11.64
137	2	803	11.5
138	2	724	11.7
139	2	104	12.27
140	2	94	12.38
141	2	99	12.51
142	2	2120	11.6
143	2	2184	11.58
144	2	2139	11.53
[truncated: 4 more columns]
